# Supplementary material for: Genome engineering and direct cloning of antibiotic gene clusters via phage ϕBT1 integrase-mediated site-specific recombination in Streptomyces
Source: PubMed Central journal article supplement (PMC4349145; doi:10.1038/srep08740), 2015-03-04
Supplement: srep08740-s1.pdf [file srep08740-s1.pdf]

**Genome engineering and direct cloning of antibiotic gene clusters via phage  $\phi$ BT1 integrase-mediated site-specific recombination in *Streptomyces***

Deyao Du<sup>a,b#</sup>, Lu Wang<sup>a,c#</sup>, Yuqing Tian<sup>a</sup>, Hao Liu<sup>c</sup>, Huarong Tan<sup>a\*</sup>, Guoqing Niu<sup>a\*</sup>

<sup>a</sup> State Key Laboratory of Microbial Resources, Institute of Microbiology, Chinese Academy of Sciences, Beijing, China

<sup>b</sup> University of Chinese Academy of Sciences, Beijing, China

<sup>c</sup> Key Laboratory of Industrial Fermentation Microbiology, Ministry of Education, College of Biotechnology, Tianjin University of Science and Technology, Tianjin, China

<sup>#</sup> D. D. and W.L. contributed equally to this work.

\*Address correspondence to Guoqing Niu, niugq@im.ac.cn, or Huarong Tan, tanhr@im.ac.cn  
State Key Laboratory of Microbial Resources, Institute of Microbiology, Chinese Academy of Sciences, Beijing 100101, China

## Supplementary Information

**Table S1 Primers used in this study**

| Primer                   | Sequence (5' → 3')                                             | Purpose                            |
|--------------------------|----------------------------------------------------------------|------------------------------------|
| oriT F                   | AATTGAATTCTGGCCAGCTAGCTAGAGTCG                                 | <i>oriT</i> cloning                |
| oriT R                   | AATTGAATTCTGGAATCGCTAGAGCTTGCATG                               | <i>oriT</i> cloning                |
| act-Up F                 | AATTCTAGATCTTCCCCATGCGGGACA                                    | pSV::attB6-act<br>construction     |
| act-Up R                 | AATTGGATCCGCCGCGACCTTCACCGAG                                   | pSV::attB6-act<br>construction     |
| act-Dn F                 | TCTCTGGACACTGATCCATGGGAACTACTCA<br>GCAGGATCCTCAGCGGCCCGTGGCACC | pKC1139::attP6-act<br>construction |
| act-Dn R                 | AATTGAATTCGGACGCGACGCCCCCTCAGGAC                               | pKC1139::attP6-act<br>construction |
| attB <sub>6</sub> -in F  | TTGACGAAACTGATCCAGATGATCCAGCTCTAG<br>ATCTTCCCCATGCGGG          | pSV::attB6-act<br>construction     |
| attB <sub>6</sub> -out F | AATAAGCTTCCAGGTTTTTGACGAAACTGATCC<br>AGATG                     | pSV::attB6-act<br>construction     |
| attP <sub>6</sub> F      | AATAAGCTTTGCTGGGTTGTTGTCTCTGGACAC<br>TGATCCATGGG               | pKC1139::attP6-act<br>construction |
| nap-Up F                 | AATTCTAGATCAGGCGCGGCGGACGATGA                                  | pSV::attB6-nap<br>construction     |

|                    |                                           |                                    |
|--------------------|-------------------------------------------|------------------------------------|
| nap-Up R           | AATT <u>GGATCC</u> GGACTTGTCCCCTAGTCAAGCC | pSV::attB6-nap<br>construction     |
| nap-Dn F           | AATT <u>GGATCCA</u> AGCCGAGGAGGACCCGCATG  | pKC1139::attP6-nap<br>construction |
| nap-Dn R           | AATT <u>GAATTC</u> GTGCGCCTCGTCCTCGACCA   | pKC1139::attP6-nap<br>construction |
| dap-Up F           | AATT <u>CTAGA</u> AGACCGTCCGCGCCGGAGGT    | pSV::attB6-dap<br>construction     |
| dap-Up R           | AATT <u>AGATCT</u> CGTCGGCCCGGAGTACGGCG   | pSV::attB6-dap<br>construction     |
| dap-Dn F           | AATT <u>GGATCC</u> GAACGGGCCTTGCGGGTGTCTG | pKC1139::attP6-dap<br>construction |
| dap-Dn R           | AATT <u>GAATTC</u> CTGGACGTGTCCGGGGCA     | pKC1139::attP6-dap<br>construction |
| B <sub>6</sub> -VF | CACACAGGAAACAGCTATGACC                    | excision confirmation              |
| P <sub>6</sub> -VF | GATCGGCACTTTGCATCGGCCG                    | excision confirmation              |
| actUp-VR           | GCGTACTGGAGTGGATGG                        | excision confirmation              |
| actDn-VR           | GCACTACCTCCACACGCC                        | excision confirmation              |
| napUp-VR           | TCGTGTTGTGCGGTGATGTTC                     | excision confirmation              |
| napDn-VR           | GTTCAGCAGTACATCGACAACG                    | excision confirmation              |
| dapUp-VR           | CGCCCATCTGCTGAACTT                        | excision confirmation              |
| dapDn-VR           | AGCGAACTGCTCTCCACCCA                      | excision confirmation              |

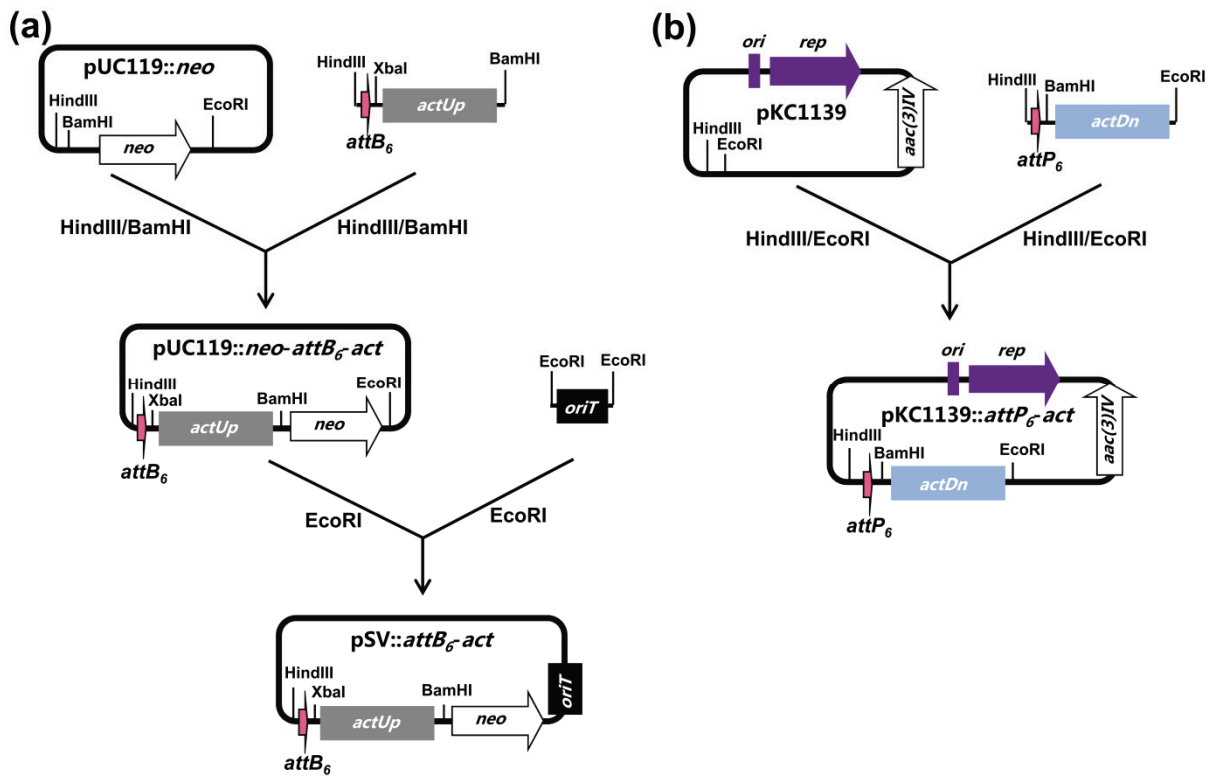

**Figure S1. Schematic diagram for the construction of pSV::attB<sub>6</sub>-act (a) and pKC1139::attP<sub>6</sub>-act (b).** *neo*: kanamycin resistance gene; *oriT*: the origin of transfer from plasmid RK2; *actUp*: a 2.0 kb fragment flanking the 5' end of *act* gene cluster; *aac(3)IV*: apramycin resistance gene; *ori*: temperature-sensitive origin of replication from pSG5; *rep*: *rep* encoding a replication initiator protein from pSG5; *actDn*: a 2.0 kb fragment flanking the 3' end of *act* gene cluster.

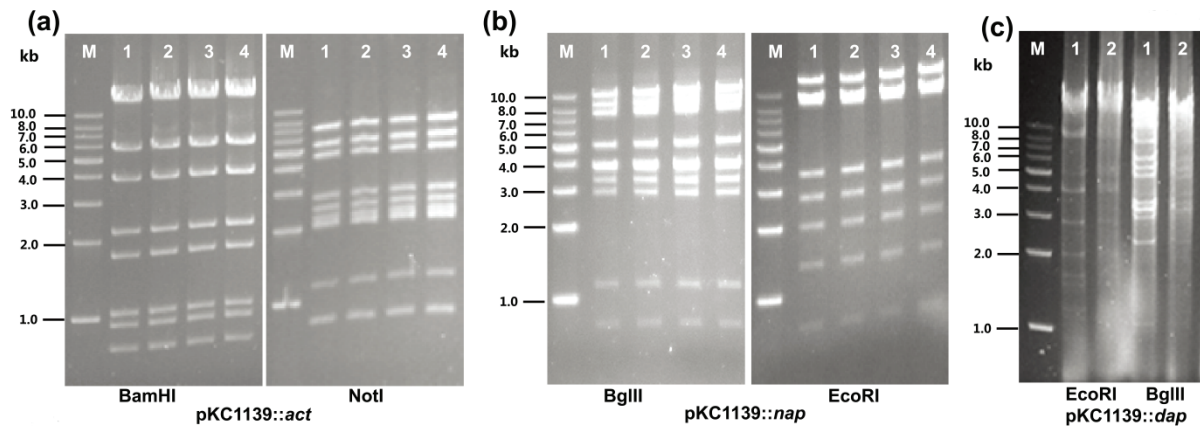

**Figure S2. Confirmation of pKC1139::act, pKC1139::nap and pKC1139::dap by restriction digestion.** (a) Agarose gel electrophoresis showing pKC1139::act digested with BamHI and NotI, respectively. Expected fragment sizes of BamHI digestion are 15222, 5804, 3923, 2172, 1731, 1029, 928 and 743 bp. Expected fragment sizes of NotI digestion are 7136, 5391, 4700, 2767, 2437, 2209, 2087, 2018, 1166, 827 and 814 bp. (b) Agarose gel electrophoresis showing pKC1139::nap digested with BglII and EcoRI, respectively. Expected fragment sizes of BglII digestion are 10307, 8539, 7714, 5145, 3956, 3910, 3829, 3292, 2849, 1138, and 776 bp. Expected fragment sizes of EcoRI digestion are 14082, 9347, 8860, 8481, 3620, 2724, 1991, 1345, 735 and 270 bp. (c) Agarose gel electrophoresis showing pKC1139::dap digested with EcoRI and BglII, respectively. Expected fragment sizes of EcoRI digestion are 57543, 35396, 31107, 16871, 7908, 3883, 2685, 1920, 1563, 1433, 1154, 897, 510 and 455 bp. Expected fragment sizes of BglII digestion are 33236, 22195, 13746, 10869, 9456, 9448, 9385, 9198, 8231, 7470, 5915, 5292, 4856, 3479, 3270, 3183, 2247, 1046, 648, 102 and 53 bp. M: 1 kb DNA Ladder.

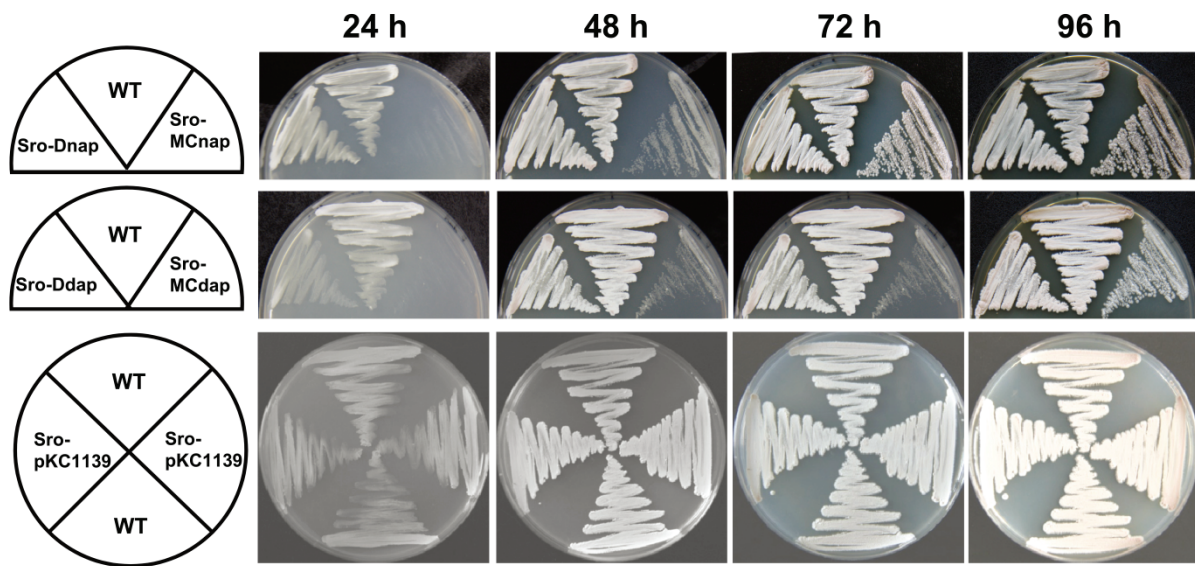

**Figure S3. Effect of extra copy numbers of antibiotic gene clusters on growth of *Streptomyces*.** Phenotype of *S. roseosporus* NRRL 15998 (WT), Sro-MCnap, Sro-Dnap, Sro-MCdap, Sro-Ddap and Sro-pKC1139 after growth on AS-1 agar media for 24, 48, 72 and 96 h. Representative images of three independent experiments with similar results are shown.

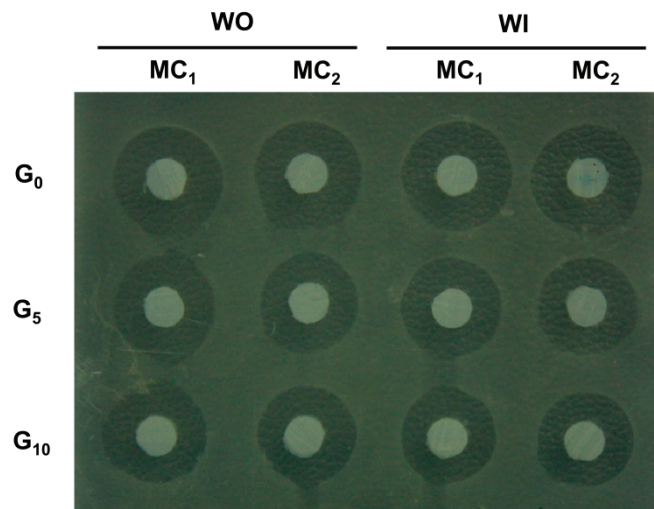

**Figure S4. Analysis of daptomycin production in different Sro-MCdap strains.** Two randomly chosen strains of Sro-MCdap (MC<sub>1</sub> and MC<sub>2</sub>) were passed consecutively for five or ten times on AS-1 plates supplemented with (WI) or without (WO) apramycin. The bioassay against *S. aureus* was performed as in Figure 5. G<sub>0</sub>; the original Sro-MCdap strains; G<sub>5</sub>, Sro-MCdap passed consecutively on AS-1 plates for five times; G<sub>10</sub>, Sro-MCdap passed consecutively on AS-1 plates for ten times.
